# Supplementary material
Source: Springer Nature journal article supplement (https://www.springermedizin.de/resource/supplementary/12891_2013_2048_MOESM7_ESM.pdf/9509296)
Supplement: MOESM7 [file 9509296]

Water content ratio (%)

90  
85  
80  
75  
70  
65  
60  
55  
50

Uncov

Cov

Medial

Uncov

Cov

Lateral

\*\*

\*\*

\*\*

\*
